# Supplementary material for: Presence of atypical genotypes of Toxoplasma gondii isolated from cats in the state of Bahia, Northeast of Brazil
Source: PubMed Central journal article supplement (PMC8491887; doi:10.1371/journal.pone.0253630), 2021-10-05
Supplement: pone.0253630.s001.pdf [file pone.0253630.s001.pdf]

1 S1 Table. Summary of Markers, gene, location and enzymes used in PCR-RFLP (Restriction Fragment Length Polymorphism) (Su et al., 2010)

| Marker   | Gene  | Location        | Multiplex PCR primers                                                                         | nPCR primers                                         | nPCR (bp) | Restriction enzymes | Incubation time and temperature   | Reference                                |
|----------|-------|-----------------|-----------------------------------------------------------------------------------------------|------------------------------------------------------|-----------|---------------------|-----------------------------------|------------------------------------------|
| SAG1     | SAG1  | chromosome VIII | F**:GTTCTAACCACGCACCCTGAG<br>R***:AAGAGTGGGAGGCTCTGTGA                                        | F: CAATGTGCACCTGTAGGAAGC<br>R:GTGGTTCTCCGTCCGGTGTGAG | 390       | Sau96I + HaeII      | 37°C 1h. 2,5% gel                 | Grigg et al., 2001b ; Khan et al., 2005a |
| 5'SAG2   | SAG2  | chromosome VIII | It is not necessary. The DNA fragment for 5'SAG2 is covered by the external alt.SAG2 primers. | F:GAAATGTTTCAGGTTGCTGC<br>R:GCAAGAGCGAACTTGAACAC     | 242       | MboI                | 37°C 1h. 2,5% gel                 | Howe et al., 1997; Khan et al., 2005a    |
| 3'SAG2   | SAG2  | chromosome VIII | F:TCTGTTCTCCGAAGTACTCC<br>R:TCAAAGCGTGCATTATCGC                                               | F:ATTCTCATGCCTCCGCTTC<br>R:AACGTTTCACGAAGGCACAC      | 222       | HhaI                | 37°C 1h. 2,5% gel                 | Lehmann et al., 2006 Khan et al., 2005a  |
| alt.SAG2 | SAG2  | chromosome VIII | F:GGAACGCGAACAATGAGTTT<br>R:GCACTGTTGTCCAGGGTTTT                                              | F:ACCCATCTGCGAAGAAAACG<br>R:ATTTCCAGCAGCGGAGCAC      | 546       | HinfI +TaqI         | 37°C 30min, 65°C 30 min. 2,5% gel | Grigg et al., 2001b; Khan et al., 2005a  |
| SAG3     | SAG3  | chromosome XII  | F:CAACTCTCACCATTCCACCC<br>R:GCGCGTTGTTAGACAAGACA                                              | F:TCTTGTCGGGTGTTCACTCA<br>R:CACAAGGAGACCGAGAAGGA     | 225       | NciI                | 37°C 1h. 2,5% gel                 | Khan et al., 2005a                       |
| BTUB     | BTUB  | chromosome IX   | F:TCCAAAATGAGAGAAATCGT<br>R:AAATTGAAATGACGGAAGAA                                              | F:GAGGTCATCTCGGACGAACA<br>R:TTGTAGGAACACCCGGACGC     | 411       | BsiEI +TaqI         | 60°C 1h. 2,5% gel                 | Khan et al., 2005a                       |
| GRA6     | GRA6  | chromosome X    | F:ATTTGTGTTTCCGAGCAGGT<br>R:GCACCTTCGCTTGTGGTT                                                | F:TTTCCGAGCAGGTGACCT<br>R:TCGCCGAAGAGTTGACATAG       | 344       | MseI                | 37°C 1h. 2,5% gel                 | Khan et al., 2005a                       |
| C22-8    | C22-8 | chromosome Ib   | F:TGATGCATCCATGCGTTTAT<br>R:CCTCCACTTCTTCGGTCTCA                                              | F:TCTCTCTACGTGGACGCC<br>R:AGGTGCTTGGATATTCGC         | 521       | BsmAI + MboII       | 37°C 30min, 55°C 30 min. 2,5% gel | Khan et al., 2005a                       |
| C29-2    | C29-2 | chromosome III  | F:ACCCACTGAGCGAAAAGAAA<br>R:AGGGTCTCTTGCGCATAACAT                                             | F:AGTTCTGCAGAGTGTCCG<br>R:TGTCTAGAAAAGAGGCCG         | 446       | HpyCH4IV + RsaI     | 37°C 1h. 2% gel                   | Khan et al., 2005a                       |
| L358     | L358  | chromosome o V  | F:TCTCTCGACTTCGCCTCTTC<br>R:GCAATTTCTCGAAGACAGG                                               | F:AGGAGGCGTAGCGCAAGT<br>R:CCCTCTGGCTGCAGTGCT         | 418       | HaeIII + NlaIII     | 37°C 1h. 2,5% gel                 | Khan et al., 2005 a,                     |

---

|              |       |                          |                                                    |                                                   |     |               |                   |                         |
|--------------|-------|--------------------------|----------------------------------------------------|---------------------------------------------------|-----|---------------|-------------------|-------------------------|
| <b>PK1</b>   | PK1   | chromosome VI            | F:GAAAGCTGTCCACCCTGAAA<br>R:AGAAAGCTCCGTGCAGTGAT   | F:CGCAAAGGGAGACAATCAGT<br>R:TCATCGCTGAATCTCATTGC  | 903 | AvaI + RsaI   | 37°C 1h. 2,5% gel | Khan et al.,<br>2005 a, |
| <b>APICO</b> | Apico | Apicoplast<br>chromosome | F:ATGGTTTTAACCTAGATTGTGG<br>R:ACGGAATTAATGAGATTGAA | F:GCAAATTCCTGAATTCTCAGTT<br>R:GGGATTCGAACCCTTGATA | 640 | AflIII + DdeI | 37°C 1h. 2,5% gel | Dubey et al;<br>2007    |

---

2 \* CutSmart Buffer® was used for all reactions; \*\*F: forward *primer*; \*\*\*R: reverse *primer*

3
