# Supplementary material for: Presence of atypical genotypes of Toxoplasma gondii isolated from cats in the state of Bahia, Northeast of Brazil
Source: PubMed Central journal article supplement (PMC8491887; doi:10.1371/journal.pone.0253630), 2021-10-05
Supplement: pone.0253630.s002.pdf [file pone.0253630.s002.pdf]

1

**S2 Table. Microsatellite markers and PCR primers used for the PCR assay**

2

| Marker       | Chromosome (position) <sup>a</sup> | Repeat Reason<br>(s)                           | Primer Sequence <sup>b</sup>                                             | Band size<br>(bp) |
|--------------|------------------------------------|------------------------------------------------|--------------------------------------------------------------------------|-------------------|
| <i>TUB2</i>  | IX (974608 to 974896)              | [TG/AC] <sub>n</sub>                           | (F) 5' 6-FAM-GTCCGGGTGTTCTACAAAA 3'<br>(R) 5' TTGGCCAAAGACGAAGTTGT 3'    | 287-291           |
| <i>W35</i>   | II (633241 to 633482)              | [TC/AG] <sub>n</sub> ,<br>[TG/AC] <sub>n</sub> | (F) 5' HEX-GGTTCACTGGATCTTCTCCAA 3'<br>(R) 5' AATGAACGTGCTTGTTC 3'       | 242-248           |
| <i>TgM-A</i> | X (4824879 to 4825083)             | [TG/AC] <sub>n</sub>                           | (F) 5' HEX-GGCGTCGACATGAGTTTCTC 3'<br>(R) 5' TGGGCATGTAAATGTAGAGATG 3    | 203-211           |
| <i>B18</i>   | VIIa (2921536 to 2921693)          | [TG/AC] <sub>n</sub>                           | (F) 5' 6-FAM-TGGTCTTACCCTTTCATCC 3'<br>(R) 5' AGGGATAAGTTTCTTCACAACGA 3' | 156-170           |
| <i>B17</i>   | XII (6474746 to 6475079)           | [TC/AG] <sub>n</sub>                           | (F) 5' HEX-AACAGACACCCGATGCCTAC 3'<br>(R) 5' GGCAACAGGAGGTAGAGGAG 3      | 334-366           |
| <i>M33</i>   | IV (672591 to 672760)              | [TC/AG] <sub>n</sub>                           | (F) 5' 6-FAM- TACGCTTCGCATTGTACCAG 3'<br>(R) 5' TCTTTTCTCCCCTTCGCTCT 3'  | 165-173           |
| <i>IV.1</i>  | IV (742419 to 742693)              | [TG/AC] <sub>n</sub>                           | (F) 5' HEX-GAAGTTCGGCCTGTTCTC 3'<br>(R) 5' TCTGCCTGGAAAAGGAAAGA 3'       | 272-282           |
| <i>XI.1</i>  | XI (189702 to 190058)              | [TG/AC] <sub>n</sub>                           | (F) 5' 6-FAM-GCGTGTGACGAGTTCTGAAA 3'<br>(R) 5' AAGTCCCCTGAAAAGCCAAT 3'   | 354-362           |
| <i>M48</i>   | Ia (332951 to 333166)              | [TA/AT] <sub>n</sub>                           | (F) 5' 6-FAM-AACATGTCGCGTAAGATTTCG 3'                                    | 209-243           |

|    |             |                           |                      |                                      |         |
|----|-------------|---------------------------|----------------------|--------------------------------------|---------|
| 3  |             |                           |                      | (R) 5' CTCTTCACTGAGCGCCTTTC 3'       |         |
| 4  | <b>M102</b> | VIIa (3093491 to 3093664) | [TA/AT] <sub>n</sub> | (F) 5' NED-CAGTCCAGGCATACCTCACC 3'   | 164-196 |
| 5  |             |                           |                      | (R) 5' CAATCCCAAATCCCAAACC 3         |         |
| 6  | <b>N60</b>  | Ib (1766079 to 1766221)   | [TA/AT] <sub>n</sub> | (F) 5' NED-GAATCGTCGAGGTGCTATCC 3'   | 132-157 |
| 7  |             |                           |                      | (R) 5' AACGGTTGACCTGTGGCGAGT 3       |         |
| 8  | <b>N82</b>  | XII (1621472 to 1621585)  | [TA/AT] <sub>n</sub> | (F) 5' HEX-TGCGTGCTTGTCAGAGTTC 3'    | 105-145 |
| 9  |             |                           |                      | (R) 5' GCGTCCTTGACATGCACAT 3         |         |
| 10 | <b>AA</b>   | VIII (5836880 to 5837144) | [TA/AT] <sub>n</sub> | (F) 5' NED-GATGTCCGGTCAATTTTGCT 3'   | 251-332 |
| 11 |             |                           |                      | (R) 5' GACGGGAAGGACAGAAACAC 3'       |         |
| 12 | <b>N61</b>  | VIIb (4217145 to 4217238) | [TA/AT] <sub>n</sub> | (F) 5' 6-FAM-ATCGGCGGTGGTTGTAGAT 3'  | 79-123  |
| 13 |             |                           |                      | (R) 5' CCTGATGTTGATGTAAGGATGC 3'     |         |
| 14 | <b>N83</b>  | X (1772898 to 1773209)    | [TA/AT] <sub>n</sub> | (F) 5' 6-FAM-ATGGGTGAACAGCGTAGACA 3' | 306-338 |
| 15 |             |                           |                      | (R) 5' GCAGGACGAAGAGGATGAGA 3'       |         |

---

15

16

17 a) Based on the position within each chromosome of the ME49 strain, as indicated on the Toxo DB website (<http://toxodb.org>). b) (F), direct initiator; (R), reverse primer. In each primer, the direct  
 18 primer was labeled in part 5 with fluoroscein: 6-carboxyfluorescein (6-FAM) for MS TUB2, XI.1, B18, N83, N61, M33 and M48, hexachlorofluorescein (HEX) for MS TgM -A , B17, N82, W35  
 19 and IV.1 and 2,7,8-benzo -5-fluoro-2, 4,7-trichloro-5-carboxyfluorescein (NED) for MS AA, N60 and M102. SOURCE: Ajzenberg et al., (2010).

20

21
