# Supplementary material for: Presence of atypical genotypes of Toxoplasma gondii isolated from cats in the state of Bahia, Northeast of Brazil
Source: PubMed Central journal article supplement (PMC8491887; doi:10.1371/journal.pone.0253630), 2021-10-05
Supplement: pone.0253630.s003.pdf [file pone.0253630.s003.pdf]

1 S3 Table. Different *T. gondii* genotypes using PCR-RFLP in Bahia, Brazil.

| Reference       | Isolated             | Molecular Marker |           |           |      |      |      |       |       |      |     |       |     |
|-----------------|----------------------|------------------|-----------|-----------|------|------|------|-------|-------|------|-----|-------|-----|
|                 |                      | SAG1             | 5'+3'SAG2 | alt. SAG2 | SAG3 | BTUB | GRA6 | c22-8 | c29-2 | L358 | PK1 | Apico | CS3 |
| Reference (I)   | RH                   | I                | I         | I         | I    | I    | I    | I     | I     | I    | I   | I     | I   |
| Reference (II)  | PTG                  | II or III        | II        | II        | II   | II   | II   | II    | II    | II   | II  | II    | II  |
| Reference (III) | CTG                  | II or III        | III       | III       | III  | III  | III  | III   | III   | III  | III | III   | III |
| Reference       | TgCgCa 1<br>(COUGAR) | I                | II        | II        | III  | II   | II   | II    | u-1   | I    | u-2 | I     | II  |
| Reference       | MAS                  | u-1              | I         | II        | III  | III  | III  | u-1   | I     | I    | III | I     | II  |
| Reference       | TgCatBr 5            | I                | III       | III       | III  | III  | III  | I     | I     | I    | u-1 | I     | II  |
| This study      | TgCatBr 85           | I                | I         | I         | I    | III  | u-1  | I     | III   | III  | I   | III   | u-1 |
|                 | TgCatBr 86           | I                | I         | III       | III  | I    | I    | I     | III   | I    | I   | I     | I   |
|                 | TgCatBr 87           | I                | I         | III       | I    | III  | Nd   | II    | III   | III  | nd  | III   | I   |
|                 | TgCatBr 88           | I                | I         | III       | III  | III  | III  | II    | III   | I    | I   | III   | I   |

|                               |                               |     |     |     |     |     |     |     |     |     |     |     |    |
|-------------------------------|-------------------------------|-----|-----|-----|-----|-----|-----|-----|-----|-----|-----|-----|----|
|                               | TgCatBr 89                    | I   | I   | III | u-1 | I   | III | II  | I   | u-1 | u-1 | I   | I  |
| <b>Silva et al 2017 (Dog)</b> | TgDgBA 6                      |     |     | Nd  |     |     |     |     |     |     |     |     | Nd |
|                               |                               | I   | III |     | III | I   | III | I   | II  | I   | u-2 | I   |    |
|                               | TgDgBA 13                     | I   | III | Nd  | III | II  | III | I   | II  | III | u-2 | I   | Nd |
|                               | TgDgBA 17                     | I   | II  | Nd  | III | II  | III | u-1 | II  | I   | u-2 | I   | Nd |
|                               | TgDgBA 21                     | I   | I   | Nd  | III | I   | III | u-1 | II  | III | u-2 | I   | Nd |
| <b>Bezerra et al (Pigs)</b>   | TgPgBr 06, 08, 11, 12, 14, 15 | I   | I   | Nd  | III | III | Nd  | I   | Nd  | Nd  | I   | III | Nd |
|                               | TgPgBr7                       | I   | I   | Nd  | III | III | Nd  | u-1 | Nd  | Nd  | NA  | III | Nd |
|                               | TgPgBr9                       | I   | I   | Nd  | III | II  | Nd  | I   | Nd  | Nd  | I   | III | Nd |
|                               | TgPgBr10                      | u-1 | I   | Nd  | III | III | Nd  | III | Nd  | Nd  | I   | III | Nd |
|                               | TgPgBr13                      | I   | I   | Nd  | III | I   | Nd  | III | Nd  | Nd  | u-1 | III | Nd |
|                               | TgPgBr16                      | I   | I   | Nd  | III | I   | Nd  | I   | Nd  | Nd  | I   | III | Nd |
| <b>Maciel et al (Sheep)</b>   | #54                           | I   | I   | Nd  | I   | III | III | III | u-1 | u-1 | u-1 | III | Nd |
|                               | #124                          | I   | I   | Nd  | I   | III | III | III | u-1 | u-1 | u-1 | III | Nd |
|                               | #127                          | I   | I   | Nd  | I   | III | III | III | u-1 | u-1 | u-1 | III | Nd |

|                                                             |                                         |   |         |     |         |     |     |     |         |     |     |     |     |
|-------------------------------------------------------------|-----------------------------------------|---|---------|-----|---------|-----|-----|-----|---------|-----|-----|-----|-----|
| <b>Bezerra et al 2015</b><br><b>(Chaetomys subspinosus)</b> | TgCsBr 01                               | I | I       | Nd  | III     | Nd  | Nd  | I   | Nd      | Nd  | III | III | Nd  |
|                                                             | TgCsBr 01                               | I | I       | Nd  | III     | Nd  | Nd  | III | Nd      | Nd  | I   | III | Nd  |
|                                                             | TgCsBr 01                               | I | I       | Nd  | III     | Nd  | Nd  | III | Nd      | Nd  | I   | III | Nd  |
| <b>Rocha et al 2018 (Chickens)</b>                          | 6 (TgCkBr 288, 289, 290, 291, 292, 293) | I | I       | I   | I       | I   | III | II  | III     | III | I   | III | III |
|                                                             | 2 (Tg294, 295)                          | I | III     | III | III     | I   | III | u-1 | I       | I   | I   | III | I   |
|                                                             | 4 (TgCkBr 296, 301, 305, 308)           | I | III     | III | III     | III | III | I   | III     | III | I   | III | I   |
|                                                             | 1 (TgCkBr 302)                          | I | I       | I   | III     | I   | I   | II  | I       | III | I   | III | I   |
|                                                             | 1 (TgCkBr303)                           | I | III     | III | III     | III | II  | I   | III     | III | I   | III | I   |
|                                                             | 1 (TgCkBr 304)                          | I | I       | I   | III     | I   | III | u-1 | I       | I   | I   | I   | I   |
|                                                             | 1 (TgCkBr307)                           | I | I       | I   | III     | I   | III | II  | I       | III | I   | III | I   |
|                                                             | 1 (TgCkBr 300)                          | I | III     | III | III     | I   | Nd  | Nd  | III     | I   | Nd  | III | I   |
|                                                             | 1 (TgCkBr306)                           | I | III     | III | III     | Nd  | III | Nd  | Nd      | Nd  | I   | III | I   |
|                                                             | 1 (TgCkBr284)                           | I | I       | I   | I e III | I   | III | III | III     | I   | I   | III | III |
|                                                             | 1 (TgCkBr 287)                          | I | I       | I   | I e III | I   | III | II  | III     | III | I   | III | III |
|                                                             | 1 (TgCkBr 297)                          | I | I e III | III | III     | I   | II  | u-1 | I       | I   | I   | I   | I   |
|                                                             | 2 (TgCkBr 298, 299)                     | I | I       | II  | III     | III | III | I   | I e III | I   | II  | III | I   |

3

4

5

6

7

8
