# Supplementary material for: Presence of atypical genotypes of Toxoplasma gondii isolated from cats in the state of Bahia, Northeast of Brazil
Source: PubMed Central journal article supplement (PMC8491887; doi:10.1371/journal.pone.0253630), 2021-10-05
Supplement: pone.0253630.s004.pdf [file pone.0253630.s004.pdf]

**S4 Table. Genotyping by MS of *Toxoplasma gondii* isolates from cats in Bahia-Brazil and compared to isolates from other studies. Three archetypal reference strains (ENT, ME49 and NED) are included.**

| Microsatellite Markers      |           |          |                |     |       |            |            |     |      |            |                     |            |            |            |            |            |            |
|-----------------------------|-----------|----------|----------------|-----|-------|------------|------------|-----|------|------------|---------------------|------------|------------|------------|------------|------------|------------|
| Reference                   | Isolated  | MS type  | Typing Markers |     |       |            |            |     |      |            | Fingerprint Markers |            |            |            |            |            |            |
|                             |           |          | TUB2           | W35 | TgM-A | B18        | B17        | M33 | IV.1 | XI.1       | M48                 | M102       | N60        | N82        | AA         | N61        | N83        |
|                             | ENT       | I        | 291            | 248 | 209   | 160        | 342        | 169 | 274  | 358        | 209                 | 166        | 145        | 119        | 267        | 87         | <b>308</b> |
|                             | ME49      | II       | 289            | 242 | 207   | 158        | 336        | 169 | 274  | 356        | 215                 | 174        | 142        | 111        | 265        | 91         | <b>310</b> |
|                             | NED       | III      | 289            | 242 | 205   | 160        | 336        | 165 | 278  | 356        | 215                 | 190        | 147        | 111        | 267        | 91         | <b>312</b> |
| <b>This study</b>           |           |          |                |     |       |            |            |     |      |            |                     |            |            |            |            |            |            |
|                             | TgCatBr85 | Atypical | 289            | 242 | 205   | 158        | <b>332</b> | 165 | -    | -          | <b>211</b>          | <b>162</b> | <b>131</b> | 111        | <b>245</b> | <b>103</b> | 302        |
|                             | TgCatBr86 | Atypical | <b>261*</b>    | -   | 205   | -          | <b>332</b> | 165 | 274  | 356        | -                   | <b>164</b> | -          | <b>109</b> | -          | <b>101</b> | 302        |
|                             | TgCatBr87 | Atypical | 289            | 242 | 205   | 158        | <b>332</b> | 165 | 274  | <b>352</b> | -                   | <b>162</b> | <b>131</b> | <b>109</b> | <b>247</b> | <b>103</b> | 302        |
|                             | TgCatBr88 | Atypical | 289            | 242 | 205   | <b>144</b> | 336        | -   | 274  | -          | <b>211</b>          | <b>164</b> | <b>131</b> | 111        | <b>247</b> | <b>101</b> | 302        |
|                             | TgCatBr89 | Atypical | 289            | 242 | -     | 160        | <b>332</b> | -   | 274  | 356        | 209                 | <b>162</b> | <b>131</b> | -          | <b>245</b> | <b>103</b> | 302        |
| <b>Ajzenberg et al 2010</b> |           |          |                |     |       |            |            |     |      |            |                     |            |            |            |            |            |            |
|                             | P         | I        | 291            | 248 | 209   | 160        | 342        | 169 | 274  | 358        | 209                 | 166        | 145        | 121        | 267        | 87         | <b>308</b> |
|                             | CT1       | I        | 291            | 248 | 209   | 160        | 342        | 169 | 274  | 358        | 209                 | 168        | 145        | 119        | 265        | 87         | <b>306</b> |
|                             | GIL       | I        | 291            | 248 | 209   | 160        | 342        | 169 | 274  | 358        | 209                 | 166        | 147        | 119        | 265        | 87         | <b>306</b> |
|                             | BK        | I        | 291            | 248 | 209   | 160        | 342        | 169 | 274  | 358        | 209                 | 166        | 145        | 119        | 265        | 87         | <b>316</b> |
|                             | NTE       | II       | 289            | 242 | 207   | 158        | 336        | 169 | 274  | 356        | 221                 | 176        | 140        | 113        | 269        | 103        | <b>310</b> |
|                             | PTG       | II       | 289            | 242 | 207   | 158        | 336        | 169 | 274  | 356        | 215                 | 174        | 142        | 111        | 265        | 91         | <b>310</b> |
|                             | BOU       | II       | 289            | 244 | 207   | 158        | 336        | 169 | 274  | 356        | 213                 | 178        | 140        | 113        | 259        | 99         | <b>310</b> |
|                             | CTG       | III      | 289            | 242 | 205   | 160        | 336        | 165 | 278  | 356        | 215                 | 190        | 147        | 111        | 269        | 89         | <b>312</b> |
|                             | NED       | III      | 289            | 242 | 205   | 160        | 336        | 165 | 278  | 356        | 209                 | 190        | 147        | 111        | 267        | 91         | <b>312</b> |
|                             | M7741     | III      | 289            | 242 | 205   | 160        | 336        | 165 | 278  | 356        | 215                 | 190        | 147        | 111        | 267        | 91         | <b>312</b> |
|                             | VEG       | III      | 289            | 242 | 205   | 160        | 336        | 165 | 278  | 356        | 213                 | 188        | 153        | 111        | 267        | 89         | <b>312</b> |
|                             | MAS       | Atypical | 291            | 242 | 205   | 162        | 362        | 169 | 272  | 358        | 221                 | 166        | 142        | 111        | 332        | 95         | <b>338</b> |
|                             | CASTELLS  | Atypical | 287            | 242 | 207   | 158        | 358        | 169 | 274  | 356        | 239                 | 164        | 138        | 109        | 283        | 87         | <b>324</b> |
|                             | TgCatBr1  | Atypical | 289            | 242 | 205   | 160        | 342        | 165 | 278  | 358        | 233                 | 164        | 147        | 111        | 316        | 89         | <b>308</b> |
|                             | GUY-KOE   | Atypical | 289            | 246 | 203   | 160        | 337        | 165 | 274  | 356        | 209                 | 172        | 136        | 111        | 251        | 109        | <b>310</b> |

S4 Table cont.

## Microsatellite Markers

| Reference             | Isolated         | MS type    | Typing Markers |     |       |     |     |     |      |      | Fingerprint Markers |      |     |     |     |     |     |
|-----------------------|------------------|------------|----------------|-----|-------|-----|-----|-----|------|------|---------------------|------|-----|-----|-----|-----|-----|
|                       |                  |            | TUB2           | W35 | TgM-A | B18 | B17 | M33 | IV.1 | XI.1 | M48                 | M102 | N60 | N82 | AA  | N61 | N83 |
|                       | GUY-MAT          | Atypical   | 291            | 242 | 203   | 160 | 339 | 165 | 272  | 358  | 221                 | 174  | 138 | 107 | 277 | 95  | 312 |
|                       | RUB              | Atypical   | 289            | 242 | 205   | 170 | 360 | 167 | 274  | 356  | 223                 | 190  | 142 | 109 | 259 | 85  | 312 |
|                       | GPHT             | Atypical   | 291            | 248 | 205   | 160 | 342 | 165 | 274  | 354  | 229                 | 166  | 147 | 111 | 283 | 91  | 306 |
|                       | BOF              | Atypical   | 291            | 248 | 205   | 160 | 342 | 165 | 274  | 354  | 227                 | 166  | 147 | 111 | 273 | 89  | 306 |
|                       | CAST             | Atypical   | 291            | 242 | 205   | 158 | 342 | 167 | 276  | 356  | 211                 | 168  | 147 | 119 | 279 | 87  | 306 |
|                       | TgCatBr5         | Atypical   | 291            | 242 | 205   | 160 | 362 | 165 | 278  | 356  | 237                 | 174  | 140 | 111 | 265 | 89  | 314 |
|                       | P89              | Atypical   | 291            | 242 | 205   | 160 | 348 | 165 | 278  | 356  | 213                 | 190  | 142 | 111 | 261 | 87  | 314 |
|                       | TgCatBr3         | Atypical   | 289            | 242 | 205   | 160 | 348 | 165 | 278  | 356  | 213                 | 190  | 142 | 111 | 263 | 113 | 312 |
|                       | VAND             | Atypical   | 291            | 242 | 203   | 162 | 344 | 167 | 276  | 356  | 217                 | 170  | 142 | 113 | 277 | 91  | 308 |
|                       | GUY-DOS          | Atypical   | 289            | 246 | 203   | 160 | 344 | 167 | 272  | 356  | 229                 | 176  | 142 | 113 | 263 | 85  | 312 |
| <b>Can et al 2014</b> |                  |            |                |     |       |     |     |     |      |      |                     |      |     |     |     |     |     |
|                       | TgCatTr_Izmir 1  | (Type II)  | 289            | 242 | 207   | 158 | 336 | 169 | 274  | 356  | 227                 | 176  | 142 | 117 | 263 | 87  | 314 |
|                       | TgCatTr_Izmir 2  | (Type II)  | 289            | 242 | 207   | 158 | 336 | 169 | 274  | 356  | 227                 | 172  | 145 | 131 | 263 | 99  | 310 |
|                       | TgCatTr_Izmir 3  | (Type II)  | 289            | 242 | 207   | 158 | 336 | 169 | 274  | 356  | 227                 | 176  | 140 | 115 | 279 | 95  | 312 |
|                       | TgCatTr_Izmir 4  | (Africa 1) | 291            | 248 | 205   | 160 | 342 | -   | 274  | 354  | 231                 | 166  | 147 | 111 | 295 | 91  | 310 |
|                       | TgCatTr_Izmir 5  | (Type II)  | 289            | 242 | 207   | 158 | 336 | 169 | 274  | 356  | 223                 | 176  | 142 | -   | 273 | 87  | 314 |
|                       | TgCatTr_Izmir 6  | (Type II)  | 289            | 242 | 207   | 158 | 336 | 169 | 274  | 356  | 211                 | 176  | 140 | 123 | 275 | 85  | 314 |
|                       | TgCatTr_Izmir 7  | (Type II)  | 289            | 242 | 207   | 158 | 336 | 169 | 274  | 356  | 213                 | 178  | 140 | 111 | 263 | 97  | 316 |
|                       | TgCatTr_Izmir 8  | (Type II)  | 289            | 242 | 207   | 158 | 336 | 169 | 274  | 356  | 219                 | 176  | 142 | 123 | -   | 85  | 310 |
|                       | TgCatTr_Izmir 9  | (Type II)  | 289            | 242 | 207   | 158 | 336 | 169 | 274  | 356  | 213                 | 178  | 140 | 119 | 295 | 101 | 310 |
|                       | TgCatTr_Izmir 10 | (Type III) | 289            | 242 | 205   | 160 | 336 | 165 | 278  | 356  | 213                 | 190  | 147 | 111 | 267 | 87  | 314 |
|                       | TgCatTr_Izmir 11 | (Type II)  | 289            | 242 | 207   | 158 | 336 | 169 | 274  | 356  | 223                 | 176  | 142 | 127 | 277 | 85  | 314 |
|                       | TgCatTr_Izmir 12 | (Type II)  | 289            | 242 | 207   | 158 | 336 | 169 | 274  | 356  | 215                 | 178  | 138 | 109 | 297 | 109 | 310 |
|                       | TgCatTr_Izmir 13 | (Type II)  | 289            | 242 | 207   | 158 | 336 | 169 | 274  | 356  | 213                 | 176  | 140 | 117 | 259 | 87  | 314 |
|                       | TgCatTr_Izmir 14 | (Type III) | 289            | 242 | 205   | 160 | 336 | 165 | 278  | 356  | 213                 | 190  | 149 | 111 | 265 | 91  | 312 |
|                       | TgCatTr_Izmir 15 | (Type II)  | 289            | 242 | 207   | 158 | 336 | 169 | 274  | 356  | 227                 | 176  | 140 | 115 | 265 | 97  | 312 |
|                       | TgCatTr_Izmir 16 | (Type II)  | 289            | 242 | 207   | 158 | 336 | 169 | 274  | 356  | 221                 | 176  | 142 | 115 | 271 | 103 | 312 |
|                       | TgCatTr_Izmir 17 | (Type II)  | 289            | 242 | 207   | 158 | 336 | 169 | 274  | 356  | 213                 | 174  | 140 | 109 | 265 | 91  | 308 |
|                       | TgCatTr_Izmir 18 | (Type II)  | 289            | 242 | 207   | 158 | 336 | 169 | 274  | 356  | 215                 | 174  | 140 | 125 | 261 | 87  | 314 |

| S4 Table cont.                       |                  |           | Microsatellite Markers |     |       |     |     |     |      |      |                     |      |     |     |     |     |     |
|--------------------------------------|------------------|-----------|------------------------|-----|-------|-----|-----|-----|------|------|---------------------|------|-----|-----|-----|-----|-----|
| Reference                            | Isolated         | MS type   | Typing Markers         |     |       |     |     |     |      |      | Fingerprint Markers |      |     |     |     |     |     |
|                                      |                  |           | TUB2                   | W35 | TgM-A | B18 | B17 | M33 | IV.1 | XI.1 | M48                 | M102 | N60 | N82 | AA  | N61 | N83 |
|                                      | TgCatTr_Izmir 19 | (Type II) | 289                    | 242 | 207   | 158 | 336 | 169 | 274  | 356  | 231                 | 174  | 142 | 111 | 263 | 97  | 314 |
|                                      | TgCatTr_Izmir 20 | (Type II) | 289                    | 242 | 207   | 158 | 336 | 169 | 274  | 356  | 241                 | 176  | 140 | 113 | 271 | 89  | 310 |
|                                      | TgCatTr_Izmir 21 | (Type II) | 289                    | 242 | 207   | 158 | 336 | 169 | 274  | 356  | 213                 | 172  | 145 | 111 | 267 | 97  | 310 |
|                                      | TgCatTr_Izmir 22 | (Type II) | 289                    | 242 | 207   | 158 | 336 | 169 | 274  | 356  | 213                 | 172  | 145 | 111 | 267 | 97  | 310 |
| <b>Pena et al 2017</b>               |                  |           |                        |     |       |     |     |     |      |      |                     |      |     |     |     |     |     |
|                                      | PS-TgCatBrSC1    | I variant | 291                    | 248 | 209   | 160 | 334 | 167 | 274  | 358  | 223                 | 166  | 145 | 129 | 269 | 087 | 306 |
| <b>Silva et al 2017</b>              |                  |           |                        |     |       |     |     |     |      |      |                     |      |     |     |     |     |     |
|                                      | TgCatBrFN1       |           | 289                    | 242 | 207   | 158 | 336 | 169 | 274  | 356  | 245                 | 178  | 138 | 123 | 271 | 095 | 329 |
|                                      | TgRatnoBrFN1     |           | 289                    | 242 | 207   | 158 | 336 | 169 | 274  | 356  | 235                 | 178  | 138 | 123 | 271 | 097 | 329 |
|                                      | TgRatnoBrFN2     |           | 289                    | 242 | 209   | 160 | 336 | 165 | 278  | 356  | 213                 | 190  | 145 | 111 | 267 | 087 | 308 |
|                                      | TgRatRaBrFN1     |           | 291                    | 242 | 205   | 162 | 342 | 165 | 278  | 356  | 213                 | 164  | 142 | 109 | 279 | 087 | 312 |
| <b>Pena et al 2020</b>               |                  |           |                        |     |       |     |     |     |      |      |                     |      |     |     |     |     |     |
|                                      | TgMytrBrSP1      | Atypical  | 289                    | 242 | 205   | 160 | 348 | 165 | 278  | 356  | 213                 | 190  | 142 | 111 | 263 | 103 | 312 |
| <b>Valenzuela-Moreno et al. 2020</b> |                  |           |                        |     |       |     |     |     |      |      |                     |      |     |     |     |     |     |
|                                      | TgDogMxCh<br>p3  |           | 291                    | 242 | 205   | 160 | 348 | 165 | 278  | 356  | 213                 | 190  | 145 | 111 | 261 | 87  | 314 |
|                                      | TgDogMxCh<br>p11 |           | 291                    | 248 | 205   | 158 | 342 | 165 | 276  | 358  | 211                 | 168  | 147 | 119 | 277 | 89  | 314 |

\* bold atypical alleles
